# Supplementary material
Source: Royal Society of Chemistry journal article supplement (https://www.rsc.org/suppdata/dt/1999/3817/906029d.doc)
Supplement: Supplementary file 1 [file 906029d.doc]

# Statistically Controlled Kinetics for the Formation and Decomposition of Binuclear CuII Complexes with a Large Octaaza Cryptand.

Manuel G. Basallote, Joaquín Durán, M. Jesús Fernández-Trujillo and M. Angeles Máñez.

Departamento de Ciencia de los Materiales e Ingeniería Metalúrgica y Química Inorgánica.

Facultad de Ciencias. Universidad de Cádiz. Apartado 40. Puerto Real, 11510 Cádiz, Spain.

### Deposited data

**Summary.** Kinetic studies on the formation and decomposition of the mono and binuclear CuII complexes with a symmetrical binucleating octaaza cryptand L containing two tris(2-aminoethyl)amine (tren) moieties bridged by three *m*-xylyl groups are reported. The decomposition of mononuclear CuII-L complexes upon addition of acid excess occurs with two separate kinetic steps; the rate constant for the faster step shows saturation behaviour, whereas a simple linear dependence on [H+] is observed for the slower step. Under similar conditions, the binuclear complex also decomposes in two steps, with rate constants very close to those found for the mononuclear species. The whole of kinetic data for the acid-promoted decomposition of the mono and binuclear complexes indicate that the rate constants for the successive dissociation of both metal centres are statistically controlled, the value for the first CuII being twice as large as that corresponding to the second one. The second order rate constants for the formation of the mono and binuclear complexes have been determined in very basic solutions, and the rate of co-ordination of the first metal ion is also found to double that of the second one, showing again statistically-controlled kinetics. These results clearly indicate that both tren sub-units of L behave independently during complex formation and decomposition, i.e. there is not any significant kinetic effect caused by the proximity of the metal centres and the cryptand is flexible enough to undergo rapidly any reorganisation required to accommodate them. The kinetic data for the formation and decomposition of these compounds are also compared with literature data for related complexes, and possible reaction mechanisms are discussed.

**Table S1**. Stability constants for the protonation of cryptand L and for the formation of mono and binuclear CuII-L complexes (25.0ºC, 0.10 mol dm-3 KNO3).

| Equilibrium quotient | log K | |
| --- | --- | --- |
| This work | Literature a |
|  |  |  |
| [HL]/[L][H] | 9.92 | 9.92 |
| [H2L]/[HL][H] | 9.33 | 9.26 |
| [H3L]/[H2L][H] | 8.77 | 8.75 |
| [H4L]/[H3L][H] | 7.82 | 7.67 |
| [H5L]/[H4L][H] | 7.26 | 7.16 |
| [H6L]/[H5L][H] | 6.79 | 6.59 |
|  |  |  |
| [CuL]/[Cu][L] | 16.77 | 16.79 |
| [Cu2L]/[Cu]2[L] | 26.56 | 26.20 |
| [CuLOH][H]/[CuL] | -9.71 | -9.70 |
| [Cu2LOH][H]/[Cu2L] | -4.94 | -4.58 |
| [HCuL]/[CuL][H] | 8.64 | 8.65 |
| [H2CuL]/[HCuL][H] | 7.29 | 7.29 |
| [H3CuL]/[H2CuL][H] | 6.15 | 6.23 |

a Reference 3.

**Table S2**. Observed rate constants for the acid-promoted decomposition of CuII-L complexes ([Cu]0= 2 [L]0= 6.7610-4 mol dm-3, 25.0ºC). The values of *k1obs* and *k2obs* correspond to the pseudo-first order rate constants for the faster and the slower steps, respectively, and they were derived from at least five independent measurements. a

| Conditions b | [H+]/ mol dm-3 | *k1obs*/s-1 | *k2obs*/s-1 |
| --- | --- | --- | --- |
|  |  |  |  |
| 1.0, 4.88 | 0.0103 | 65(6) | 9.1(1) |
|  | 0.0206 | 105(2) | 10.0(1) |
|  | 0.0336 | 156(9) | 12.5(7) |
|  | 0.0412 | 153(17) | 15.1(9) |
|  | 0.0618 | 202(11) | 20.0(3) |
|  | 0.1290 | 237(8) | 25.8(8) |
|  | 0.2058 | 317(14) | 23.1(9) |
|  | 0.4116 | 348(10) | 28.1(1.5) |
|  | 0.4995 | 329(11) | 27.1(1.3) |
|  |  |  |  |
| 0.1, 4.71 | 0.0102 | 110(2) | 7.0(2) |
|  | 0.0203 | 170(1) | 11.3(2) |
|  | 0.0304 | 210(2) | 14.0(3) |
|  | 0.0392 | 230(3) | 15.8(3) |
|  | 0.0490 | 245(2) | 16.6(3) |
|  |  |  |  |
| 0.1, 4.27 | 0.0102 | 102(4) | 8.0(5) |
|  | 0.0203 | 162(5) | 12.0(8) |
|  | 0.0304 | 192(3) | 14.9(9) |
|  | 0.0392 | 220(9) | 17.2(8) |
|  | 0.0490 | 240(5) | 23.7(1.3) |
|  |  |  |  |
| 0.1, 8.73 | 0.0102 | 7.5(1) | 1.2(1) |
|  | 0.0203 | 19.8(9) | 2.0(1) |
|  | 0.0304 | 21.3(1.2) | 2.4(1) |
|  | 0.0392 | 33.6(1.6) | 5.5(1) |
|  | 0.0490 | 37.6(1.6) | 6.2(2) |
|  |  |  |  |
| 0.1, 8.26 | 0.0102 | 6.7(2) | 0.5(1) |
|  | 0.0203 | 17.9(5) | 1.3(1) |
|  | 0.0304 | 23.4(1.5) | 2.4(1) |
|  | 0.0392 | 29.7(4) | 3.5(1) |
|  | 0.0490 | 35.6(1.8) | 3.9(1) |
|  |  |  |  |
| 0.1, 7.10 | 0.0102 | 8.4(8) | 1.2(1) |
|  | 0.0203 | 17.3(1) | 1.9(1) |
|  | 0.0304 | 22.1(9) | 3.6(1) |
|  | 0.0392 | 28.9(9) | 6.9(2) |
|  | 0.0490 | 34.7(1.2) | 8.9(2) |

a The numbers in parentheses represent the standard deviation in the last significant digit. bThis column includes the concentration of supporting electrolyte (in mol dm-3) and the pH of the complex solution before addition of the acid excess.

**Table S3**. Observed rate constants for the formation of CuII-L complexes in basic solutions at 25.0ºC in the presence of 1.0 mol dm-3 supporting electrolyte (KNO3 + KOH). Reported values correspond to the mean for at least five different measurements, and the numbers in parentheses indicate the standard deviation in the last significant digit.

1. Ligand excess ([Cu]0= 2.210-5 mol dm-3).

|  | [OH-]/ mol dm-3 | | | | |
| --- | --- | --- | --- | --- | --- |
| 104 [L]0/ mol dm-3 | 0.15 | 0.22 | 0.25 | 0.35 | 0.44 |
| 1.98 | 1.86(2) | 1.79(5) | 1.59(4) | 1.28(4) | 0.72(5) |
| 2.48 | 2.28(4) | 2.17(5) | 1.94(4) | 1.44(6) | 1.05(2) |
| 2.98 | 2.43(8) | 2.32(6) | 2.35(5) | 1.82(5) | 1.45(2) |
| 3.97 | 3.23(12) | 3.22(2) | 3.20(6) | 2.55(8) | 1.75(3) |
| 4.96 | 4.27(8) | 4.19(16) | 3.97(9) | 3.45(11) | 2.41(4) |

b) Metal excess ([L]0= 1.010-5 mol dm-3)

|  | | [OH-]/ mol dm-3 | | |
| --- | --- | --- | --- | --- |
| 104 [M]0/ mol dm-3 | 0.22 | | 0.33 | 0.44 |
| 1.35 | 0.98(9) | | 0.82(7) | 0.53(2) |
| 2.70 | 1.32(8) | | 1.21(5) | 0.92(1) |
| 3.60 | 1.67(9) | | 1.48(6) | 1.05(2) |
| 4.50 | 1.93(12) | | 1.71(7) | 1.25(6) |
